# Supplementary material
Source: Springer Nature journal article supplement (https://www.springermedizin.de/resource/supplementary/12936_2014_3337_MOESM2_ESM.pdf/9545690)

# Kaplan Meier analysis PCR-uncorrected efficacy

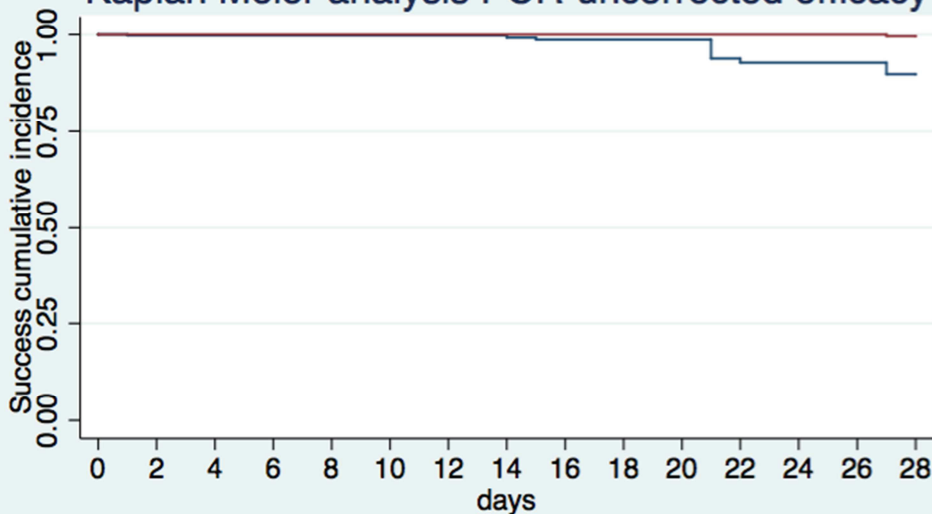

Number at risk

|              |     |     |     |     |     |     |     |     |     |     |     |     |     |     |     |
|--------------|-----|-----|-----|-----|-----|-----|-----|-----|-----|-----|-----|-----|-----|-----|-----|
| grup = AL    | 373 | 372 | 372 | 372 | 372 | 372 | 372 | 372 | 368 | 368 | 368 | 350 | 346 | 346 | 335 |
| grup = AQ-AS | 233 | 233 | 233 | 233 | 233 | 233 | 233 | 233 | 233 | 233 | 233 | 233 | 233 | 233 | 232 |

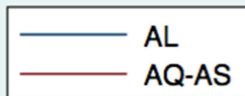

Supplement: MOESM2 [file 9545690]
